# Supplementary material for: Long-term psychological consequences of long Covid: a propensity score matching analysis comparing trajectories of depression and anxiety symptoms before and after contracting long Covid vs short Covid
Source: bioRxiv or medRxiv preprint supplement (doi:10.1101/2022.04.01.22273305), 2022-04-01
Supplement: Supplementary file [file media-1.pdf]

# Supplementary Material

Model specification:

$$Y_{ij} = \pi_{0i} + \pi_{1i}time_{ij} + \pi_{2i}time_{ij}^2 + \varepsilon_{ij} \quad (\text{Eq. 1})$$

$$\pi_{0i} = \gamma_{00} + \gamma_{01}group_i + \gamma_{01}month_i + \zeta_{0i} \quad (\text{Eq. 2})$$

$$\pi_{1i} = \gamma_{10} + \gamma_{11}group_i + \zeta_{1i} \quad (\text{Eq. 3})$$

$$\pi_{2i} = \gamma_{20} + \gamma_{21}group_i + \zeta_{2i} \quad (\text{Eq. 4})$$

The growth curve model is presented mathematically in Equation (1) to (4). Equation (1) addresses intra-individual growth where  $Y_{ij}$ , depressive or anxiety symptoms for the individual  $i$  at time  $j$ , is a function of time and its quadratic term.  $\pi_{0i}$  represents the individual  $i$ 's initial status.  $\pi_{1i}$  and  $\pi_{2i}$  represent growth rates and  $\varepsilon_{ij}$  is the residual term. Equation (2) to (4) addresses inter-individual differences in the initial status (intercept) and growth rates.  $\gamma_{00}$ ,  $\gamma_{10}$  and  $\gamma_{20}$  represent the population average initial status (intercept) and growth rates.  $\zeta_{0i}$ ,  $\zeta_{1i}$  and  $\zeta_{2i}$  are parameter residuals.

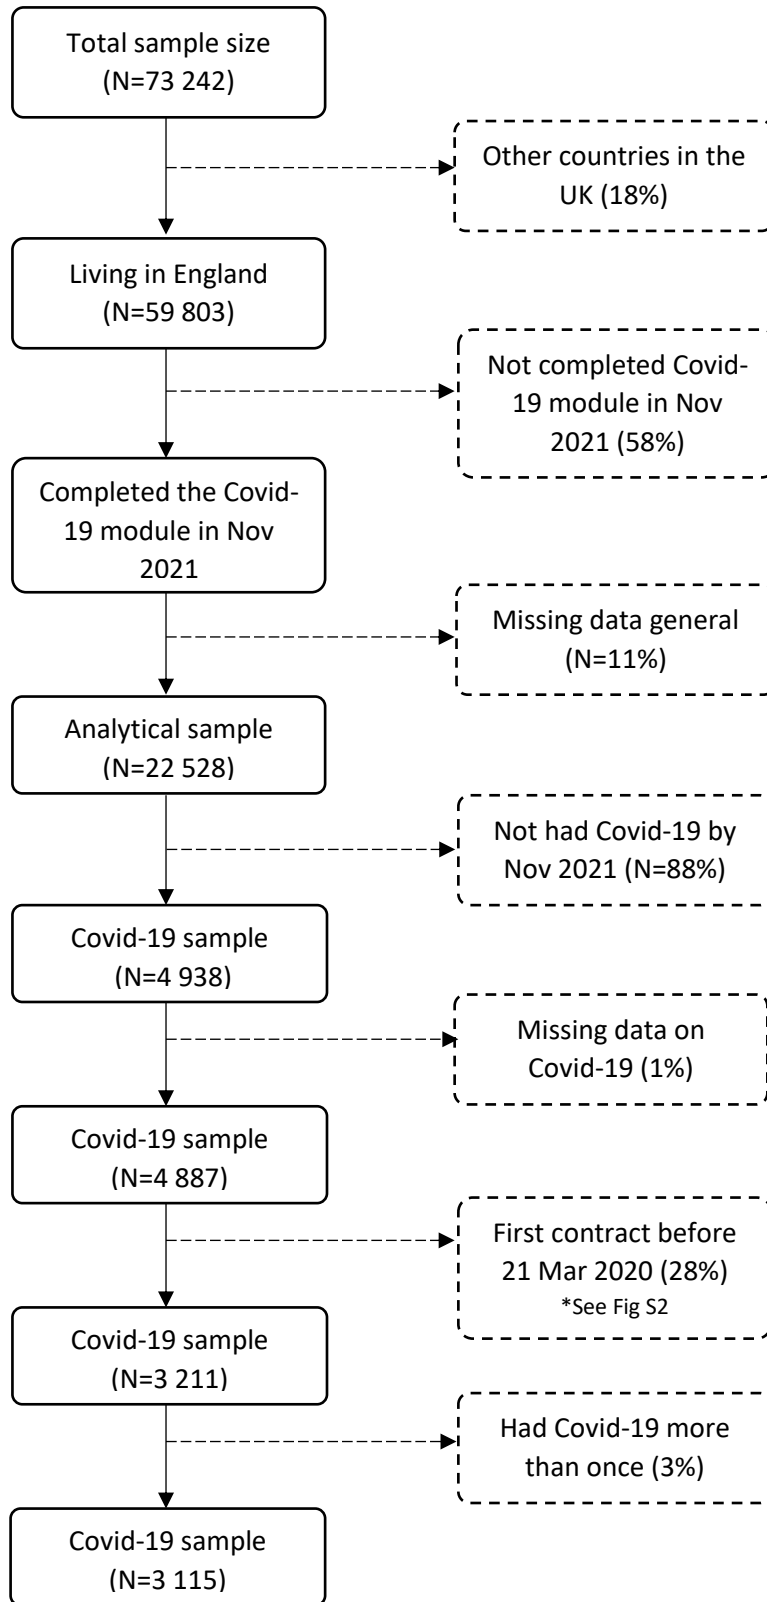

Fig S1. Sample selection process

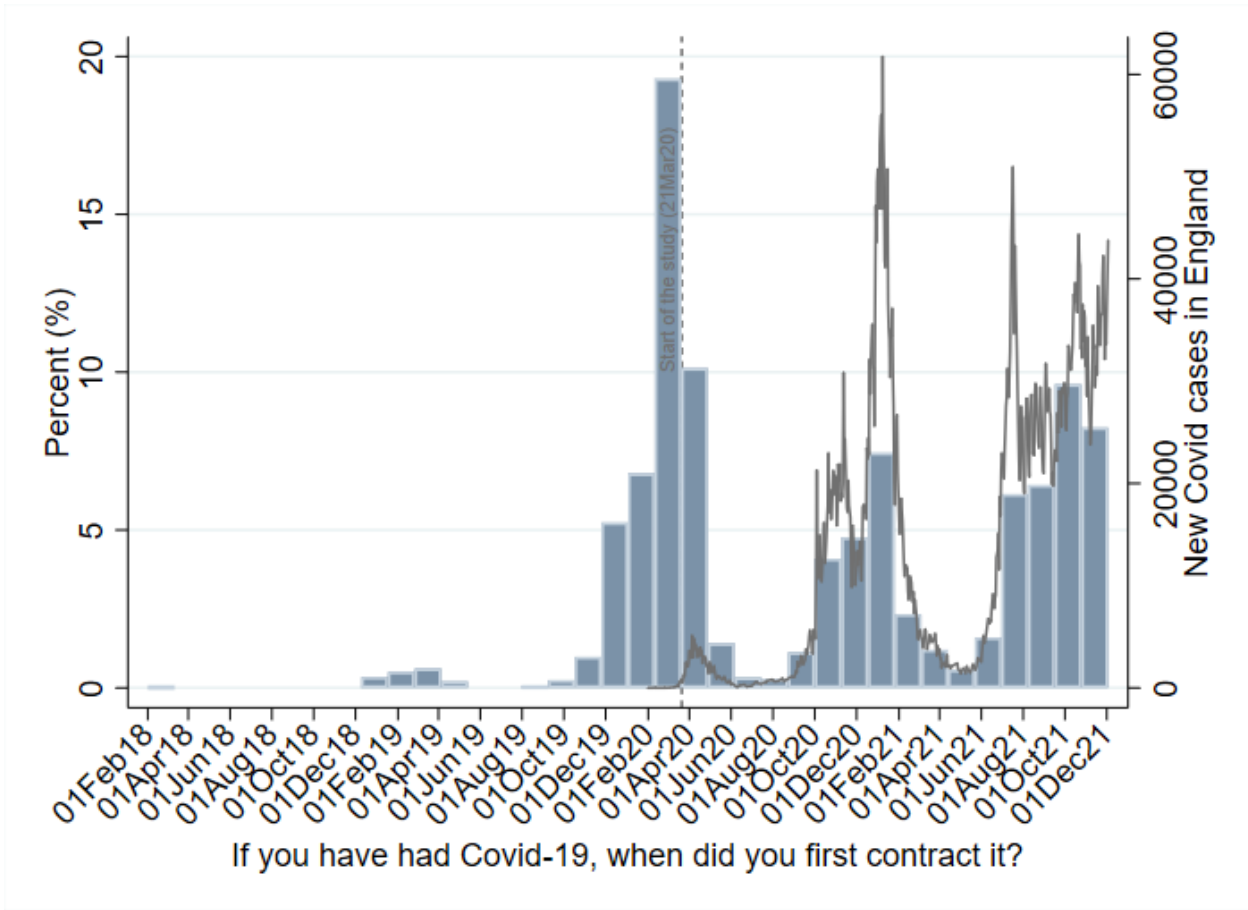

Fig S2. The date of first contract (N=4,938)

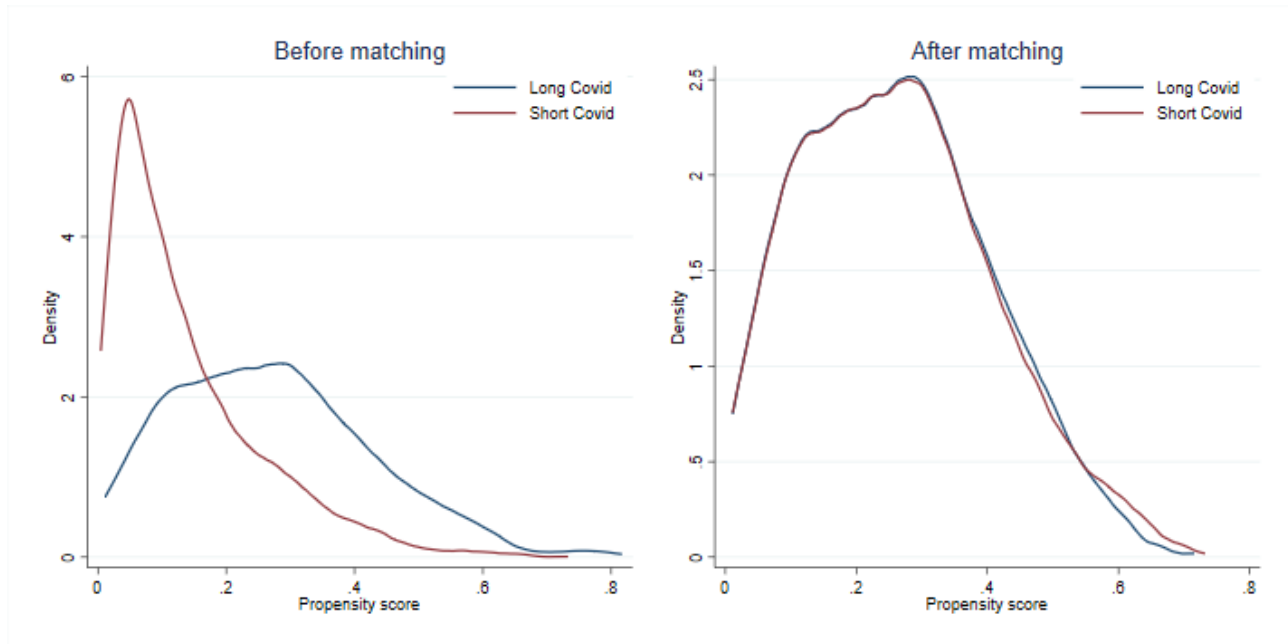

Fig S3. Propensity score density before and after matching

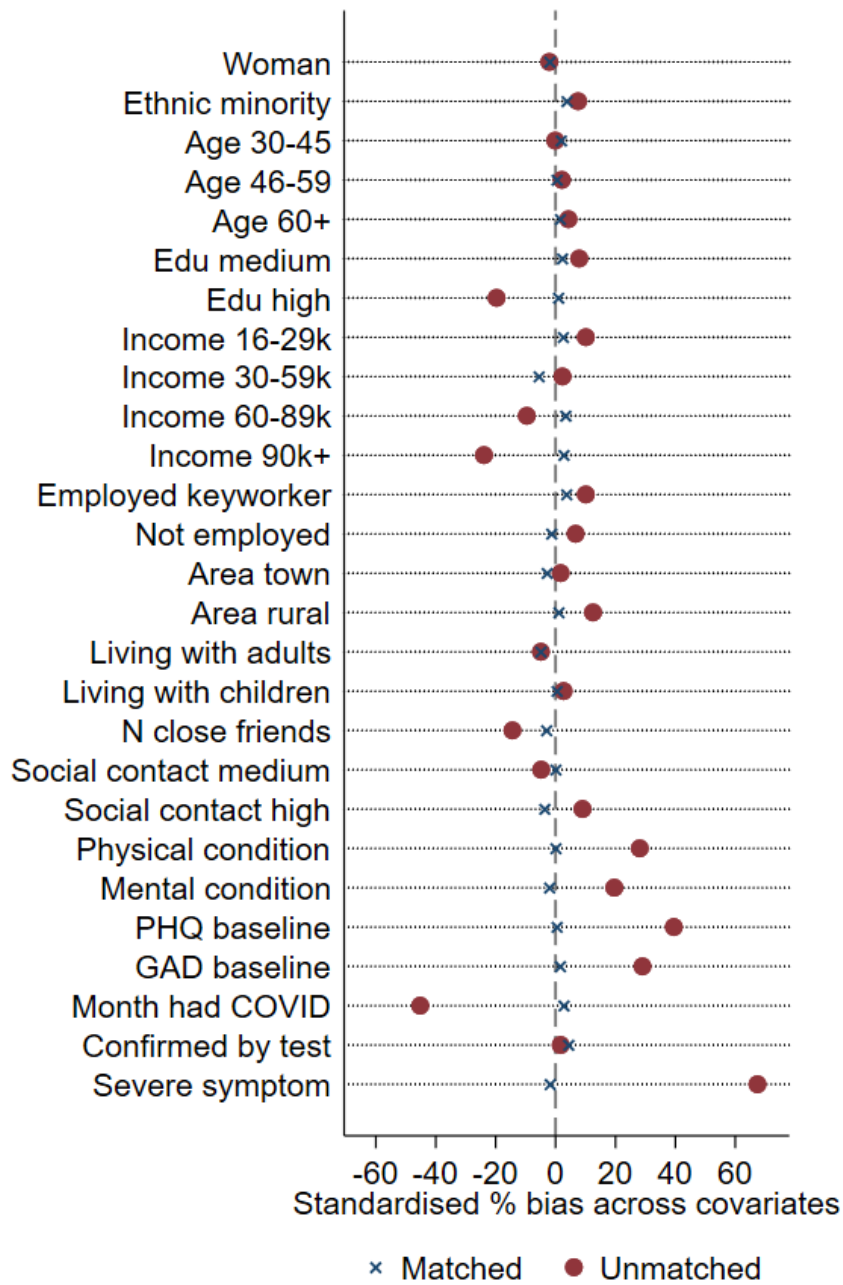

Fig S4. Standardised percentage bias for each covariate before and after matching

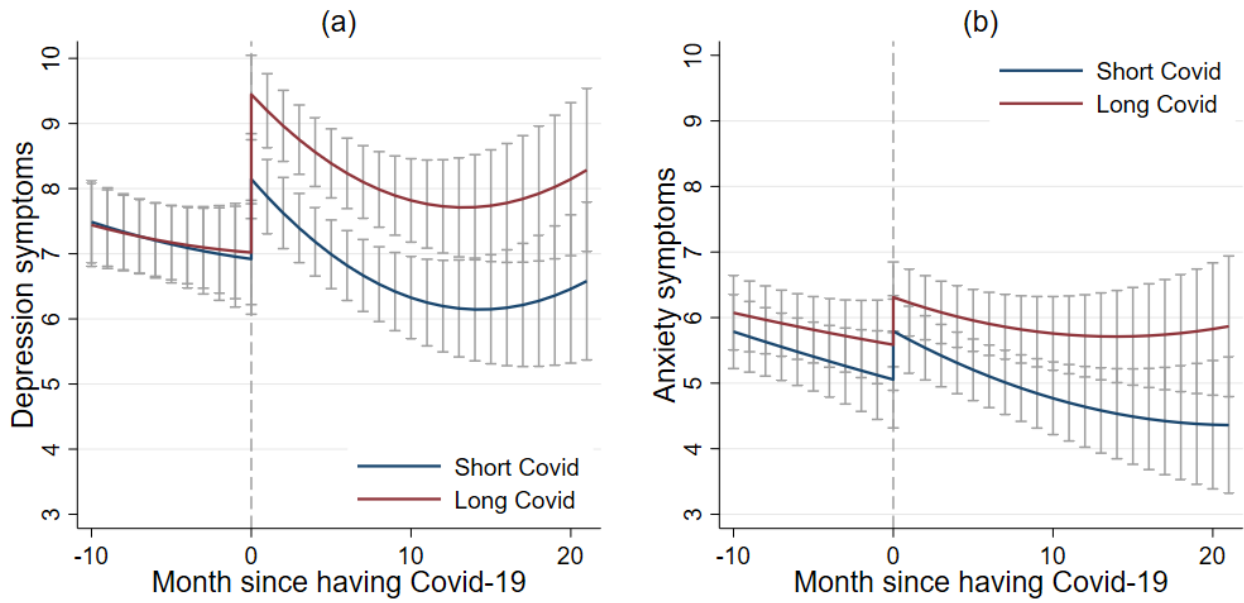

Fig S5. Predicted growth trajectories by Covid-19 group with 95% confidence intervals

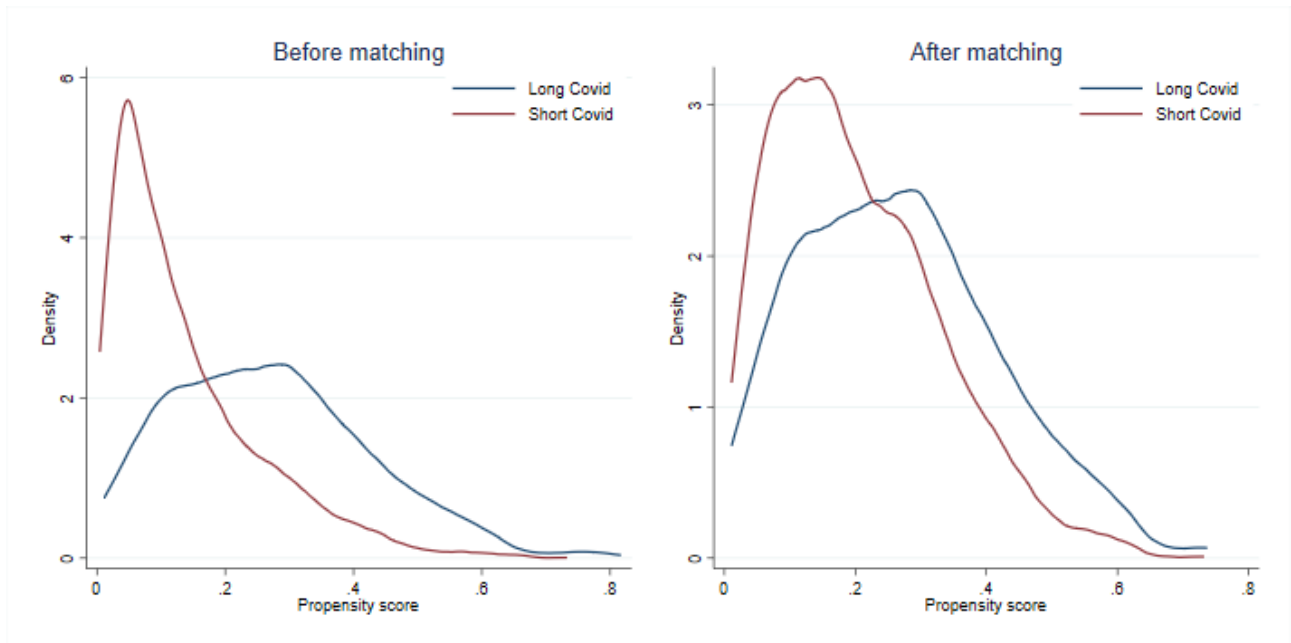

Fig S6. Propensity score density before and after matching based on one-to-many nearest neighbour matching

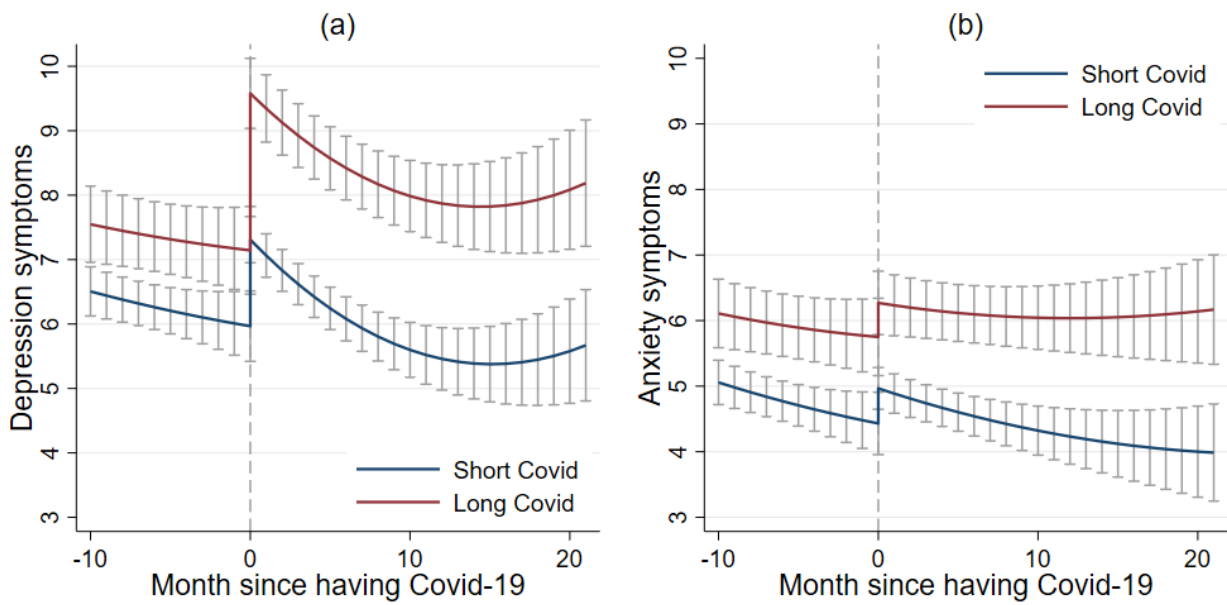

Fig S7. Predicted growth trajectories by Covid-19 group with 95% confidence intervals based on one-to-many nearest neighbour matching

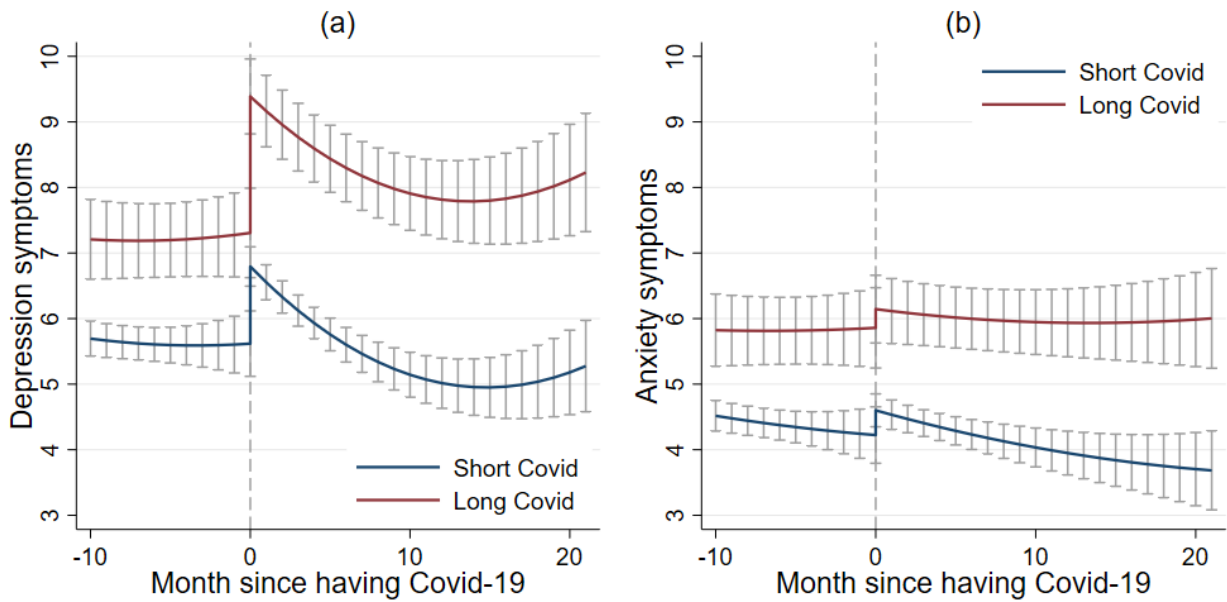

Fig S8. Predicted growth trajectories by Covid-19 group with 95% confidence intervals based on kernel matching (*NB these sensitivity analyses yielded less balanced matches so apparent differences in pre-infection mental health should be interpreted with caution*)

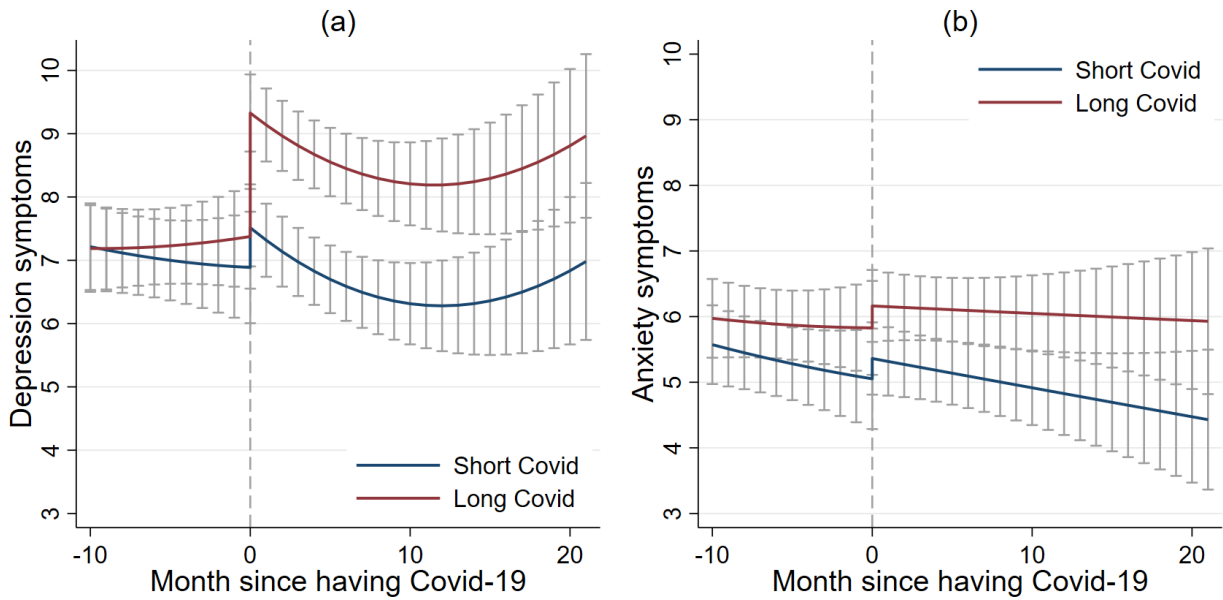

Fig S9. Predicted growth trajectories by Covid-19 group with 95% confidence intervals based on one-to-one matching excluding cases based on symptoms

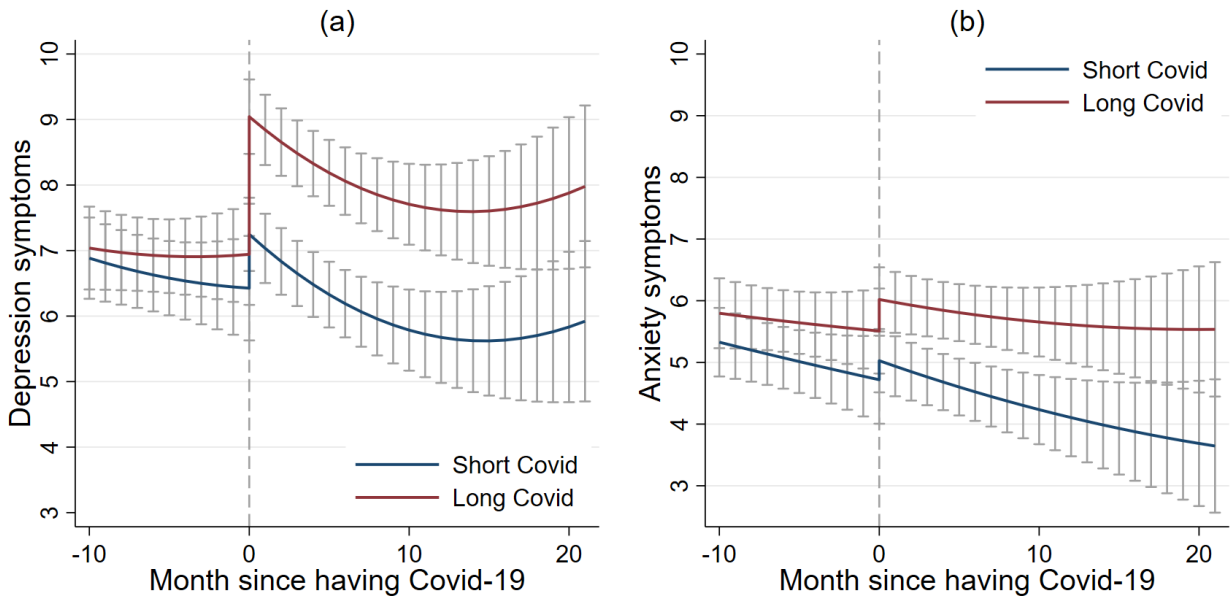

Fig S10. Predicted growth trajectories by Covid-19 group with 95% confidence intervals based on one-to-one matching excluding people who were unsure about their long Covid diagnosis

Table S1 Sample characteristics by matched Covid-19 group

|                                                      |                            | Long Covid<br>(N=481) | Short Covid<br>(N=481) |
|------------------------------------------------------|----------------------------|-----------------------|------------------------|
| Gender                                               | Men                        | 21.8%                 | 21.0%                  |
|                                                      | Women                      | 78.2%                 | 79.0%                  |
| Ethnicity                                            | White                      | 94.2%                 | 95.0%                  |
|                                                      | Ethnic minority            | 5.8%                  | 5.0%                   |
| Age group                                            | 18-29                      | 6.0%                  | 7.7%                   |
|                                                      | 30-45                      | 31.6%                 | 30.8%                  |
|                                                      | 46-59                      | 39.1%                 | 38.9%                  |
|                                                      | 60+                        | 23.3%                 | 22.7%                  |
| Education                                            | GCSE or below              | 15.4%                 | 16.6%                  |
|                                                      | A levels or equivalent     | 19.5%                 | 18.7%                  |
|                                                      | Degree or above            | 65.1%                 | 64.7%                  |
| Annual income                                        | <£16,000                   | 14.3%                 | 14.8%                  |
|                                                      | ≤£16,000-29,999            | 23.7%                 | 22.7%                  |
|                                                      | ≤£30,000-59,999            | 38.3%                 | 41.0%                  |
|                                                      | ≤£60,000-89,999            | 16.2%                 | 15.0%                  |
|                                                      | ≥£90,000                   | 7.5%                  | 6.7%                   |
| Employment status                                    | Employed, keyworker        | 39.1%                 | 40.1%                  |
|                                                      | Employed, non-keyworker    | 32.6%                 | 31.0%                  |
|                                                      | Not employed               | 28.3%                 | 28.9%                  |
| Area of living                                       | City                       | 32.0%                 | 31.0%                  |
|                                                      | Town                       | 46.8%                 | 48.2%                  |
|                                                      | Rural                      | 21.2%                 | 20.8%                  |
| Living status                                        | Living alone               | 14.8%                 | 12.5%                  |
|                                                      | Living with adult only     | 48.2%                 | 50.7%                  |
|                                                      | Living with children       | 37.0%                 | 36.8%                  |
| Social contact                                       | Twice a month or less      | 35.3%                 | 33.7%                  |
|                                                      | Once or twice a week       | 33.3%                 | 33.3%                  |
|                                                      | Three times a week or more | 31.4%                 | 33.1%                  |
| Number of close friends                              |                            | 4.7 (3.1)             | 4.8 (3.1)              |
| Physical health condition                            | Yes                        | 44.1%                 | 44.1%                  |
|                                                      | No                         | 55.9%                 | 55.9%                  |
| Mental health condition                              | Yes                        | 23.1%                 | 23.9%                  |
|                                                      | No                         | 76.9%                 | 76.1%                  |
| Baseline depressive symptoms                         |                            | 8.3 (5.9)             | 8.2 (6.0)              |
| Baseline anxiety symptoms                            |                            | 6.5 (5.4)             | 6.4 (5.2)              |
| Month had COVID-19                                   |                            | 10.5 (6.5)            | 10.3 (7.1)             |
| Confirmed by testing (COVID-19 or antibody test)     | Yes                        | 74.6%                 | 72.8%                  |
|                                                      | No                         | 25.4%                 | 27.2%                  |
| Severe symptoms (hospitalised or had to stay in bed) | Yes                        | 81.7%                 | 82.5%                  |
|                                                      | No                         | 18.3%                 | 17.5%                  |



Table S2. Detailed Covid experience measures by matched Covid-19 group

|                               |                                                                                                            | Long Covid                | Short Covid               | Total                     |
|-------------------------------|------------------------------------------------------------------------------------------------------------|---------------------------|---------------------------|---------------------------|
| Test                          | Yes, a medical professional has formally diagnosed me with long Covid                                      | 112<br>23.3%              | --                        | 112<br>11.6%              |
|                               | Yes, I have not been formally diagnosed but consider myself to have Long Covid                             | 369<br>76.7%              | --                        | 369<br>38.4%              |
|                               | No, I do not consider myself to have Long Covid                                                            | --                        | 369<br>76.7%              | 369<br>38.4%              |
|                               | I am unsure                                                                                                | --                        | 112<br>23.3%              | 112<br>11.6%              |
|                               | <b>Total</b>                                                                                               | <b>481</b><br><b>100%</b> | <b>481</b><br><b>100%</b> | <b>962</b><br><b>100%</b> |
| Severity<br>(first 1-2 weeks) | I was hospitalised                                                                                         | 30<br>6.2%                | 16<br>3.3%                | 46<br>4.8%                |
|                               | I experienced symptoms and had to rest in bed                                                              | 363<br>75.5%              | 381<br>79.2%              | 744<br>77.3%              |
|                               | I experienced symptoms but was able to carry on with daily activities                                      | 79<br>16.4%               | 71<br>14.8%               | 150<br>15.6%              |
|                               | I was asymptomatic                                                                                         | 9<br>1.9%                 | 13<br>2.7%                | 22<br>2.3%                |
|                               | <b>Total</b>                                                                                               | <b>481</b><br><b>100%</b> | <b>481</b><br><b>100%</b> | <b>962</b><br><b>100%</b> |
| Symptoms                      | My symptoms were worse at the beginning (the first 1-2 weeks) and then got better                          | 23<br>4.8%                | 179<br>37.6%              | 202<br>21.2%              |
|                               | My symptoms were worse at the beginning (the first 1-2 weeks) and then mostly got better but some lingered | 152<br>32.0%              | 167<br>35.1%              | 319<br>33.5%              |
|                               | After the first 1-2 weeks, my symptoms got better but then the same symptoms kept coming back              | 67<br>14.1%               | 21<br>4.4%                | 88<br>9.3%                |
|                               | After the first 1-2 weeks, my symptoms got better but I then developed new symptoms                        | 60<br>12.6%               | 15<br>3.2%                | 75<br>7.9%                |
|                               | Most of my symptoms lasted for 2-3 weeks                                                                   | 25<br>5.3%                | 39<br>8.2%                | 64<br>6.7%                |
|                               | Most of my symptoms lasted for 4-12 weeks                                                                  | 62<br>13.1%               | 23<br>4.8%                | 85<br>8.9%                |
|                               | Most of my symptoms lasted for more than 12 weeks                                                          | 81<br>17.1%               | 6<br>1.3%                 | 87<br>9.2%                |
|                               | I cannot answer this question (e.g. you had COVID very recently)                                           | 5<br>1.1%                 | 26<br>5.5%                | 31<br>3.3%                |
| <b>Total</b>                  | <b>475</b><br><b>100%</b>                                                                                  | <b>476</b><br><b>100%</b> | <b>951</b><br><b>100%</b> |                           |
